# Supplementary material for: ESBL Producing Escherichia coli in Faecal Sludge Treatment Plants: An Invisible Threat to Public Health in Rohingya Camps, Cox's Bazar, Bangladesh
Source: Front Public Health. 2021 Dec 15;9:783019. doi: 10.3389/fpubh.2021.783019 (PMC8714839; doi:10.3389/fpubh.2021.783019)
Supplement: Supplementary file 3 [file Table_3.XLSX]

## Sheet: Sheet1
Supplementary Table-3: Antibiotic resistance pattern against different antimicrobial agents
ID	Ampicillin (10 µg) AMP	Cefuroxim (30 µg) CXM	Ceftazidime (30 µg) CAZ	Cefotaxime (30 µg) CTX	Cefepime (30 µg) FEP	Aztreonam (30 µg) ATM	Imipenem (10 µg) IPM	Meropenem (10 µg) MEM	Amikacin (30 µg) AK	Gentamicin (10 µg) CN	Nitrofurantoin (300 µg) F	Tetracycline (30 µg) TE	Tigecycline (15 µg) TGC	Nalidixic acid (30 µg) NA	Ciprofloxacin (5 µg) CIP	Sulfamethoxazole-trimethoprim (25 µg) SXT	Chloramphenicol (30 µg) C	Azithromycin (15 µg) AZM	Fosfomycin (50 µg) FOS
R2-6A	R	R	R	R	R	R	S	S	S	S	S	S	S	S	S	S	S	R	S
R2-22A	R	R	R	R	R	R	S	S	S	S	S	R	I	I	S	S	S	R	S
R2-22C	R	R	R	R	R	R	S	S	S	S	S	R	I	I	I	S	S	R	S
R2-25A	R	R	I	R	S	S	I	S	S	S	S	S	S	R	S	R	S	R	S
R2-34A	R	R	R	R	R	R	S	S	S	S	S	R	S	I	I	I	S	R	S
R2-42A	R	R	R	R	R	R	S	S	S	S	S	S	S	R	R	R	S	R	S
R2-45A	R	R	R	R	R	S	S	S	S	S	S	S	S	S	S	S	S	S	S
R2-47B	R	I	I	R	S	S	I	S	S	S	S	S	S	S	S	S	S	R	S
R2-52B	R	R	R	R	R	R	S	S	S	S	S	R	S	R	R	S	S	S	S
R2-53B	R	R	I	R	R	R	S	S	S	S	S	S	S	R	S	S	S	S	S
R3-22D	R	I	I	R	S	S	I	S	S	S	S	S	S	R	I	R	S	R	S
R3-24C	R	R	I	R	R	R	S	S	S	S	R	S	S	R	S	S	S	S	S
R3-37A	R	R	I	R	R	R	S	S	S	S	R	S	S	R	S	S	S	R	S
R3-38B	R	R	R	R	R	R	S	S	S	S	S	S	S	S	S	S	S	R	S
R3-42A	R	R	R	R	R	R	S	S	S	S	I	R	S	R	R	I	R	S	S
R3-51A	R	R	R	R	R	R	S	S	S	S	I	S	S	R	R	R	R	S	R
R3-52A	R	R	I	R	R	R	I	S	S	S	S	S	S	S	S	S	S	S	S
R3-52B	R	R	R	R	R	R	I	S	S	S	S	S	S	S	S	R	S	S	S
R3-52D	R	R	R	R	R	R	S	S	S	S	S	S	S	S	S	S	S	S	I
R3-53A	R	R	I	R	R	R	I	S	S	S	S	S	S	I	I	R	S	R	S
R3-53B	R	R	R	R	R	R	I	S	S	S	S	S	S	I	S	R	S	R	S
R3-54A	R	R	R	R	R	R	S	S	S	S	S	S	S	I	S	S	S	S	S
R3-54B	R	R	R	R	R	R	S	S	S	S	S	S	S	S	S	S	S	S	S
R3-54C	R	R	R	R	R	R	S	S	S	S	S	S	S	I	S	S	S	S	S
R1-16A	R	R	S	R	S	I	S	S	S	S	S	R	S	R	R	S	S	R	S
R1-16B	R	R	S	R	S	I	S	S	S	S	S	R	S	R	R	S	S	S	S
R1-16C	R	R	I	R	S	I	S	S	S	S	S	R	S	R	R	S	S	S	S
	R=Resistant
	I=Intermediate
	S=Sensitive
