# Supplementary material for: ESBL Producing Escherichia coli in Faecal Sludge Treatment Plants: An Invisible Threat to Public Health in Rohingya Camps, Cox's Bazar, Bangladesh
Source: Front Public Health. 2021 Dec 15;9:783019. doi: 10.3389/fpubh.2021.783019 (PMC8714839; doi:10.3389/fpubh.2021.783019)
Supplement: Supplementary file 4 [file Table_4.XLSX]

## Sheet: Sheet1
Supplementary Table-4: List of plasmid sizes and their numbers for individual isolates
Serial no.	Isolate ID	Plasmid size (MDa)	Plasmid Number
1	R1-1A	65.80; 54.33	2
2	R1-1B	65.80; 54.33	2
3	R1-3A	85.13; 37.272	2
4	R1-3B	1.9	1
5	R1-5A	33.83; 2.47	2
6	R1-5B	86.55; 30.67; 1.8	3
7	R1-7A	58.22; 40.72	2
8	R1-7B	53.96	1
9	R1-8A	79.77; 34.99	2
10	R1-8B	81.25; 33.23;2.67; 2.37; 2.24	5
11	R1-8C	119.13	2
12	R1-8D	91.66	1
13	R1-12A	82.53; 65.44; 40.28	3
14	R1-12B	0	0
15	R1-13A	87.98; 62.73	2
16	R1-13B	76.85; 59.66; 35.68; 9.44; 4.68; 3.82	6
17	R1-15A	89.16; 34.75; 33	3
18	R1-15B	120.49; 25.89	2
19	R1-16A	63.3; 47.15; 3.54; 2.91; 2.47; 2.25	6
20	R1-16B	63.3; 47.15; 3.54; 2.39; 2.19	5
21	R1-16C	63.3; 47.15; 3.54; 2.39; 2.19	5
22	R1-19A	79.11; 64.58; 37.63	3
23	R1-19B	83.3; 66.35; 39.52	3
24	R1-20A	66.35; 29.14	2
25	R1-20B	65.03; 20.67; 2.70	3
26	R1-20C	0	0
27	R1-22A	37.54; 21.19	2
28	R1-22B	0	0
29	R1-22C	48.86; 29.85	2
30	R1-25A	64.29; 35.20	2
31	R1-25B	64.29; 35.20	2
32	R1-26A	81.57; 68.22	2
33	R1-27A	94.24; 78.61; 63.76; 53.48	4
34	R1-31A	2.97; 2.63	2
35	R1-32A	0	0
36	R1-32B	0	0
37	R1-32C	29.63	1
38	R1-32D	0	0
39	R1-33A	40.87; 3.2; 2.32	3
40	R1-33B	35.07; 4.18; 3.75; 1.50	4
41	R1-34A	0	0
42	R1-34B	0	0
43	R1-34C	0	0
44	R1-35A	55.78	1
45	R1-35B	38.8; 2.62; 1.64	3
46	R1-37A	57.83	1
47	R1-37B	0	0
48	R1-38A	53.48; 22.41	2
49	R1-38B	1.92	1
50	R2-5A	0	0
51	R2-5B	0	0
52	R2-6A	94.84; 67.56	2
53	R2-6B	36.94; 3.85; 3.01; 2.10	4
54	R2-6C	58.03; 38.79; 2.57; 2.08	4
55	R2-6D	62.53; 34.41; 27	3
56	R2-11A	58.49	1
57	R2-11B	58.49	1
58	R2-12A	0	0
59	R2-12B	0	0
60	R2-16A	211.54; 77.80; 27.92	3
61	R2-17A	89.03; 71.42; 9.37; 5.57; 4.39	5
62	R2-22A	66.45; 56.02; 2.87	3
63	R2-22B	92.66; 63.60; 3.58; 2.12; 1.77	5
64	R2-22C	66.45; 56.02; 2.87	3
65	R2-23A	66.45; 49.67; 2.36	3
66	R2-24A	56.02	1
67	R2-24B	0	0
68	R2-24C	101.44; 62.59; 4.06	3
69	R2-24D	89.08	1
70	R2-25A	96.23; 62.59; 45.39	3
71	R2-25B	68.95; 53.94; 3.74; 3.32; 2.34; 1.47; 1.27	7
72	R2-26A	128.09; 28.06	2
73	R2-26B	0	0
74	R2-26C	58.24; 44.53; 34.96	3
75	R2-26D	0	0
76	R2-29A	94.09; 72.23	2
77	R2-29B	89.33	1
78	R2-30A	102.85	1
79	R2-30B	0	0
80	R2-30C	0	0
81	R2-33A	27.53; 2.45	2
82	R2-34A	78.14; 37.01; 9.83; 7.38; 5.75; 4.59; 3.78	7
83	R2-34B	104.56	1
84	R2-38A	41.10; 2.51	2
85	R2-38B	43.32; 31.37; 94.19	3
86	R2-38C	59.16; 3.24; 2.50; 1.91	4
87	R2-40A	76.32	1
88	R2-40B	80.81	1
89	R2-41A	31.11; 26.91; 1.96; 1.37	4
90	R2-41B	12.28; 1.61; 1.19	3
91	R2-42A	40.94	1
92	R2-42B	35.65	1
93	R2-43A	35.88; 1.31	2
94	R2-43B	14.64	1
95	R2-45A	26.61; 18.75; 15.15	3
96	R2-45B	89.8	1
97	R2-46A	0	0
98	R2-46B	0	0
99	R2-46C	55.59; 51.48	2
100	R2-47A	1.28	1
101	R2-47B	28.33; 25.46	2
102	R2-48A	33.06; 9.49; 1.29	3
103	R2-48B	40.94; 14.34	2
104	R2-48C	54.53; 4.46; 3.43; 2.85; 2.19	5
105	R2-49A	74.18; 36.56	2
106	R2-49B	2.57	1
107	R2-50A	84.33	1
108	R2-50B	58.04	1
109	R2-50C	94.32	1
110	R2-51A	80.16; 5.19; 2.59	3
111	R2-51B	56.25; 46.94	2
112	R2-52A	58.04	1
113	R2-52B	81.91; 1.58	2
114	R2-52C	31.43	1
115	R2-53A	29.78	1
116	R2-53B	0	0
117	R2-54A	50.63; 42.75; 6.29; 3.71	4
124	R3-5A	62.25; 2.01	2
133	R3-11A	87.79; 31.50	2
134	R3-11B	68.61; 54.38; 38.52	3
135	R3-15A	86.25; 37.24	2
136	R3-15B	86.25; 37.24	2
125	R3-17A	56.68; 2.48	2
126	R3-18A	87.62	1
127	R3-18B	64.91; 36.70; 3.65; 2.51	4
128	R3-18C	0	0
129	R3-21A	0	0
130	R3-21B	76.76; 47.95	2
131	R3-22A	78.8	1
132	R3-22B	96.45; 64.38; 1.41	3
118	R3-23A	2.67	1
119	R3-23B	2.67	1
120	R3-24A	82.23; 56.25; 0.88	3
121	R3-24B	82.23; 56.25	2
122	R3-24C	54.57; 2.57	2
123	R3-24D	82.23	1
137	R3-25A	49.55	1
138	R3-25B	0	0
139	R3-26A	0	0
140	R3-26B	0	0
141	R3-29A	91.24	1
142	R3-29B	87.39; 32.13	2
143	R3-30A	140.06	1
144	R3-30B	55.25; 31.94; 8.02; 3.61	4
145	R3-33A	85.18	1
146	R3-33B	77.82	1
147	R3-34A	77.82	1
148	R3-34B	88.68	1
149	R3-34C	88.68	1
150	R3-34D	0	0
151	R3-37A	112.20; 61.11; 52.68	3
152	R3-37B	81.22; 72.78	2
153	R3-38A	79.83; 37.69	2
154	R3-38B	97.16; 52.68; 45.81	3
155	R3-38C	87.51; 31.81	2
156	R3-38D	91.70; 34.01	2
157	R3-41A	83.59	1
158	R3-42A	110.56; 64.61; 4.82; 2.50	4
159	R3-42B	96.19; 3.30; 2.61; 2.10; 1.97; 1.49; 1.19	7
160	R3-45A	87.51; 67.31; 6.87	3
161	R3-45B	78.51; 61.08; 49.40; 6.47	4
162	R3-46A	76.46; 30.33; 5.72	3
163	R3-46B	88.90; 35.14; 6.20	3
164	R3-49A	75.78; 38.63	2
165	R3-49B	75.78; 38.63	2
166	R3-50A	78.45; 2.44	2
167	R3-50B	78.45; 2.44	2
168	R3-50C	78.45; 2.44	2
169	R3-50D	78.45; 2.44	2
170	R3-51A	0	0
171	R3-52A	71.39; 48.69	2
172	R3-52B	71.39; 48.69	2
173	R3-52C	71.39; 48.69	2
174	R3-52D	71.39; 48.69	2
175	R3-53A	77.07; 59.55	2
176	R3-53B	77.07; 59.55	2
177	R3-54A	57.51; 39.24	2
178	R3-54B	57.51; 39.24	2
179	R3-54C	57.51; 39.24	2
180	R3-54D	57.51; 39.24	2
